# Supplementary material
Source: Springer Nature journal article supplement (https://www.springermedizin.de/resource/supplementary/13075_2011_3614_MOESM8_ESM.pdf/9694892)

A

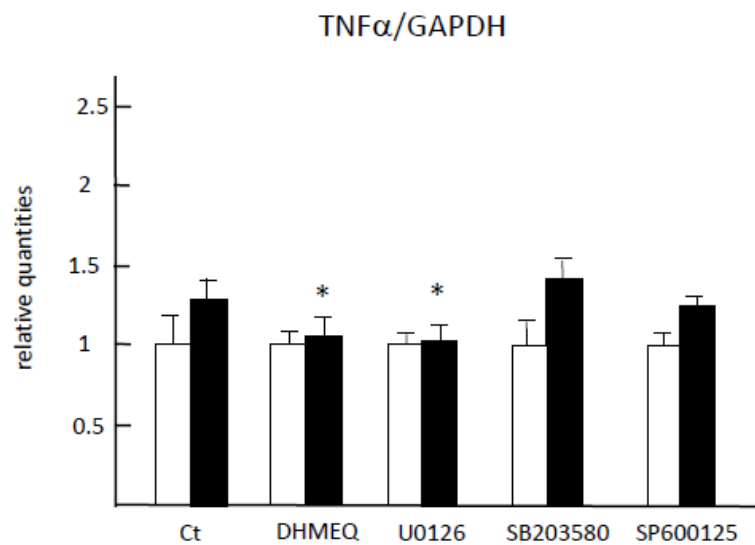

B

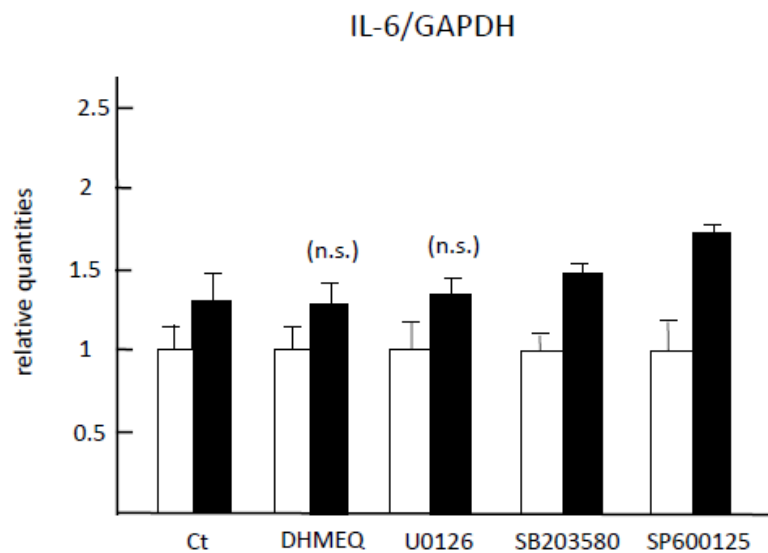

C

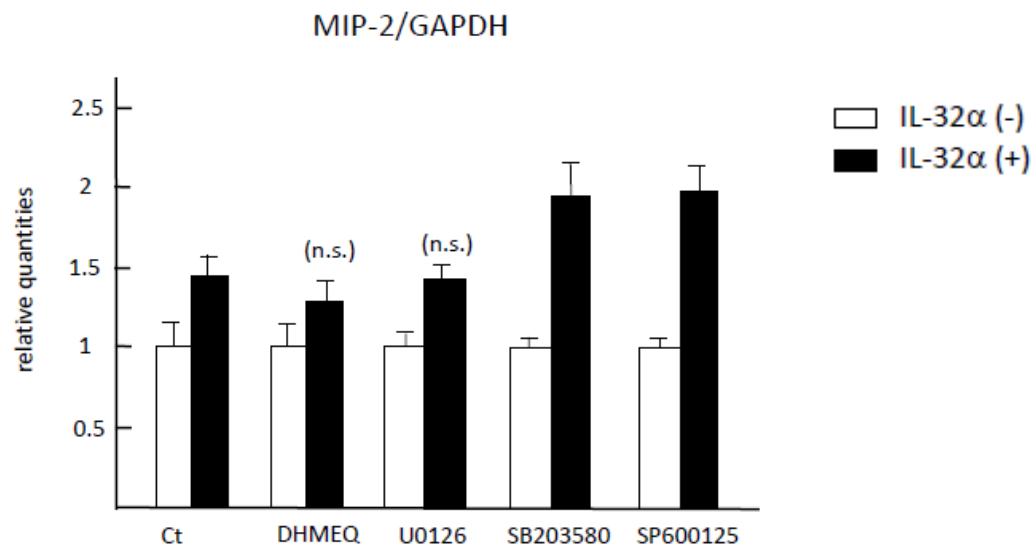

Supplement: MOESM8 [file 9694892]
